# Supplementary material for: Towards Achieving Net Zero Carbon Dioxide by Sequestering Biomass Carbon
Source: Preprints.org preprint supplement (doi:10.20944/preprints202007.0576.v4), 2021-01-15
Supplement: Supplementary file 1 [file supplementary]

Supplemental Input

Achieving Net Zero Carbon Dioxide by Sequestering Biomass Carbon

Jeffrey A. Amelse a,b

a) Universidade de Aveiro, Departamento de Química, CICECO, 3810-193 Aveiro, Portugal

b) Independent Contributor

**SI.1. Calculation of the Amount of Air With 400 ppmv CO2 Needed to Grow of 1 Acre of Corn**

The calculation is provided in the spreadsheet attached below. It takes about 0.85 acres of air from sea level to the end of the troposphere to feed the growth of 1 acre of corn.

**SI.2. EXCEL files that Calculate Urban Tree Growth Parameters in 10 Year Increment**s

EXCEL file that calculates tree growth parameters from the allometric equations provided in the USDA report [42].

**SI.3. Calculation of Percentage of Decomposable Biomass in a Bahrain Landfill That Will Have Decomposed as a Function of Years After Landfill Closure**

The following EXCEL file contains calculations of the percentage of decomposable biomass in a Bahrain Landfill that will have decomposed as a function of years after landfill closure based on extrapolation of the US EPA LandGEM model. [49], [50].
